# Supplementary material for: Assessment of Plant Invasions in Agroecosystems of Kashmir Himalaya for Better Management
Source: Frontiers journal article supplement (doi:10.3389/fagro.2021.788797), 2022-01-21
Supplement: Table_1.XLSX [file Table_1.XLSX]

## Sheet: Sheet1
	Species	Family	Group	Life span	Growth form	Habitat	Status	Orchard	Mustard	Wheat	Flax	Oats	Paddy
1	Achillea_millefolium	Asteraceae	Dicot	Perennial	Herb	Teresstrial	Invasive alien	3	0	0	0	0	2
2	Adonis_aestivalis	Ranunculaceae	Dicot	Annual	Herb	Teresstrial	Naturalized alien	2	0	1	0	1	0
3	Agrostis_stolonifora	Poaceae	Monocot	Perennial	Herb	Teresstrial	Invasive alien	0	0	0	0	6	7
4	Ajuga_parviflora	Lamiaceae	Dicot	Annual	Herb	Teresstrial	Native	0	1	0	0	0	0
5	Alisma_lanceolatum	Alismataceae	Monocot	Perennial	Herb	Aquatic	Naturalized alien	0	0	0	0	0	2
6	Alisma_plantago-aquatica	Alismataceae	Monocot	Perennial	Herb	Aquatic	Invasive alien	0	0	0	0	0	2
7	Alopecurus_aequalis	Poaceae	Monocot	Perennial	Herb	Teresstrial	Naturalized alien	0	21	6	0	0	32
8	Althaea_rosea	Malvaceae	Dicot	Biennial	Herb	Teresstrial	Casual alien	1	0	0	0	0	0
9	Amaranthus_caudatus	Amaranthaceae	Dicot	Annual	Herb	Teresstrial	Invasive alien	4	1.8	0	0	0	0
10	Ammania_auriculata	Lythraceae	Dicot	Annual	Herb	Teresstrial	Naturalized alien	0	0	0	0	0	2.3
11	Anagalis_arvensis	Primulaceae	Dicot	Annual	Herb	Teresstrial	Invasive alien	2.5	1	2	2	0	0
12	Anaphalis_nepalensis	Asteraceae	Dicot	Perennial	Herb	Teresstrial	Native	0	0	0	0	0	1.7
13	Anchusa_ovata	Boraginaceae	Dicot	Annual	Herb	Teresstrial	Native	0	1	1	0	0	0
14	Anthemis_cotula	Asteraceae	Dicot	Biennial	Herb	Teresstrial	Invasive alien	2	0	0	0	0	0
15	Arabidopsis_pumila	Brassicaceae	Dicot	Annual	Herb	Teresstrial	Native	0	2	1	0	0	0
16	Arabidopsis_thaliana	Brassicaceae	Dicot	Annual	Herb	Teresstrial	Naturalized alien	0	1	1	0	2	0
17	Arabis_nova	Brassicaceae	Dicot	Annual	Herb	Teresstrial	Native	0	2.1	0	0	2.2	0
18	Arenaria_neelgerrenisis	Caryophyllaceae	Dicot	Annual	Herb	Teresstrial	Native	2.6	0	0	0	0	0
19	Arenaria_serpyllifolia	Caryophyllaceae	Dicot	Annual	Herb	Teresstrial	Invasive alien	0	8.1	9.9	0	11.6	0
20	Artemisia_absinthium	Asteraceae	Dicot	Perennial	Herb	Teresstrial	Naturalized alien	3	0	0	0	0	0
21	Artemisia_biennis	Asteraceae	Dicot	Biennial	Herb	Teresstrial	Native	4	0	0	0	0	0
22	Arthraxon_prionodes	Poaceae	Monocot	Perennial	Herb	Teresstrial	Naturalized alien	0	0	6	0	5.9	4.3
23	Asperugo_procumbens	Boraginaceae	Dicot	Annual	Herb	Teresstrial	Naturalized alien	1	0	0	0	0	0
24	Astragalus_leucocephalous	Fabaceae	Dicot	Perennial	Subshrub	Teresstrial	Native	0	0	2	1.6	5	0
25	Avena_fatua	Poaceae	Monocot	Perennial	Herb	Teresstrial	Naturalized alien	0	4	7.9	8.1	6.6	0
26	Bothriochloa_ischaemum	Poaceae	Monocot	Perennial	Herb	Teresstrial	Invasive alien	0	0	0	4	5	0
27	Bothriochloa_pertusa	Poaceae	Monocot	Perennial	Herb	Teresstrial	Naturalized alien	0	0	0	2	3	0
28	Brassica_napus	Brassicaceae	Dicot	Annual	Herb	Teresstrial	Casual alien	7	2	3	0	0	0
29	Bromus_japonicus	Poaceae	Monocot	Annual	Herb	Teresstrial	Naturalized alien	28.6	26	14.1	0	17	14
30	Butomus_umbellatus	Butomaceae	Monocot	Perennial	Herb	Aquatic	Invasive alien	0	0	0	0	0	1.1
31	Cannabis_sativa	Cannabiaceae	Dicot	Annual	Herb	Teresstrial	Invasive alien	12	0	0	0	0	0
32	Capsella_bursa pastoris	Brassicaceae	Dicot	Annual	Herb	Teresstrial	Invasive alien	7	5	3	0	0	0
33	Cardamine_flexuosa	Brassicaceae	Dicot	Annual	Herb	Teresstrial	Naturalized alien	0	1	1	0	0	0
34	Cardamine_hirsuta	Brassicaceae	Dicot	Annual	Herb	Teresstrial	Naturalized alien	6	4	4	0	0	0
35	Carpesium_abrotanoides	Asteraceae	Dicot	Annual	Herb	Teresstrial	Naturalized alien	2	0	0	0	0	0
36	Centaurea_iberica	Asteraceae	Dicot	Biennial	Herb	Teresstrial	Invasive alien	1	0	0	0	1	0
37	Centaurea_pulchellum	Gentianaceae	Dicot	Annual	Herb	Teresstrial	Native	0	0	0	0	2	0
38	Cerastium_cerastioides	Caryophyllaceae	Dicot	Perennial	Herb	Teresstrial	Native	22.2	0	0	0	0	0
39	Cerastium_glomeratum	Caryophyllaceae	Dicot	Annual	Herb	Teresstrial	Naturalized alien	0	1	1.6	0	1	0
40	Ceratocephalus_falcatus	Ranunculaceae	Dicot	Annual	Herb	Teresstrial	Naturalized alien	0	3.8	4.9	0	2	0
41	Chenopodium_album	Chenopodiaceae	Dicot	Annual	Herb	Teresstrial	Invasive alien	0	0	0	0	0	0
42	Chenopodium_foliolosum	Chenopodiaceae	Dicot	Perennial	Herb	Teresstrial	Invasive alien	4	0	0	0	0	0
43	Chrysopogon_gryllus	Poaceae	Monocot	Perennial	Herb	Teresstrial	Native	0	0	0	0	0	3
44	Cichorium_intybus	Asteraceae	Dicot	Perennial	Herb	Teresstrial	Invasive alien	0	2	3	3	0	2
45	Cirsium_arvense	Asteraceae	Dicot	Annual	Herb	Teresstrial	Invasive alien	3	0	0	0	0	0
46	Clinopodium_umbrosum	Lamiaceae	Dicot	Perennial	Herb	Teresstrial	Naturalized alien	9	0	0	0	0	0
47	Clinopodium_vulgare	Lamiaceae	Dicot	Perennial	Herb	Teresstrial	Naturalized alien	0	2	4.1	0	0	3.6
48	Convolvulus_arvensis	Convolvulaceae	Dicot	Perennial	Herb	Teresstrial	Invasive alien	2.7	2	3	1	1.4	0
49	Conyza_bonariensis	Asteraceae	Dicot	Annual	Herb	Teresstrial	Casual alien	0	1	1	0	1	0
50	Conyza_canadensis	Asteraceae	Dicot	Biennial	Herb	Teresstrial	Invasive alien	4	2	3.6	0	2.9	0
51	Coronopus_didymus	Brassicaceae	Dicot	Annual	Herb	Teresstrial	Naturalized alien	9	1	2	0	0	0
52	Crepis_sancta	Asteraceae	Dicot	Annual	Herb	Teresstrial	Invasive alien	2	0	0	0	0	0
53	Cynodon_dactylon	Poaceae	Monocot	Perennial	Herb	Teresstrial	Native	102	79	54.1	29	84.2	42.3
54	Cynoglossum_glochidiatum	Boraginaceae	Dicot	Biennial	Herb	Teresstrial	Native	0	1	1	0	0	0
55	Cynoglossum_lanceolatum	Boraginaceae	Dicot	Biennial	Herb	Teresstrial	Naturalized alien	0	1.2	1.7	0	0	0
56	Dactylis_glomerata	Poaceae	Monocot	Annual	Herb	Teresstrial	Invasive alien	4.8	0	0	0	0	0
57	Daucus_carota	Apiaceae	Dicot	Biennial	Herb	Teresstrial	Invasive alien	3	0	2	0	3	0
58	Descurainia_sophia	Brassicaceae	Dicot	Annual	Herb	Teresstrial	Naturalized alien	0	1	1	0	0	0
59	Digitaria_cruciata	Poaceae	Monocot	Annual	Herb	Teresstrial	Native	0	0	0	0	0	5
60	Drabopsis_verna	Brassicaceae	Dicot	Annual	Herb	Teresstrial	Native	0	1	1	0	0	0
61	Duchesnia_indica	Rosaceae	Dicot	Perennial	Herb	Teresstrial	Native	0	2	2	0	0	0
62	Echinocloa_crusgalli	Poaceae	Monocot	Annual	Herb	Aquatic	Naturalized alien	0	0	0	0	0	2
63	Epilobium_hirsutum	Onagraceae	Dicot	Perennial	Herb	Teresstrial	Invasive alien	0	0	0	0	0	1.7
64	Equisetum_ramosissimum	Equisetaceae	Fern	Perennial	Herb	Teresstrial	Naturalized alien	2.5	0	0	0	0	0
65	Eragrostis_poaeoides	Poaceae	Monocot	Annual	Herb	Teresstrial	Naturalized alien	2	0	0	0	0	0
66	Erodium_cicutarium	Geraniaceae	Dicot	Annual	Herb	Teresstrial	Naturalized alien	1	5	7	0	4	0
67	Erophila_verna	Brassicaceae	Dicot	Annual	Herb	Teresstrial	Naturalized alien	0	12	11.3	0	19	0
68	Eruca_sativa	Brassicaceae	Dicot	Annual	Herb	Teresstrial	Naturalized alien	0	0	0	6.8	0	0
69	Eryngium_billardieri	Apiaceae	Dicot	Biennial	Herb	Teresstrial	Invasive alien	0	0	6.1	11.5	0	0
70	Euphorbia_helioscopia	Euphorbiaceae	Dicot	Annual	Herb	Teresstrial	Invasive alien	4	2	3.8	0	0	1.3
71	Fagopyrum_esculentum	Polygonaceae	Dicot	Annual	Herb	Teresstrial	Casual alien	2.5	0	0	0	0	0
72	Filago_arvensis	Asteraceae	Dicot	Annual	Herb	Teresstrial	Naturalized alien	0	8.9	14.2	0	0	0
73	Filago_pyramidata	Asteraceae	Dicot	Annual	Herb	Teresstrial	Naturalized alien	0	1	3	0	0	0
74	Fragaria_nubicola	Rosaceae	Dicot	Perennial	Herb	Teresstrial	Naturalized alien	6.3	0	0	0	0	0
75	Fumaria_parviflora	Papaveraceae	Dicot	Annual	Herb	Teresstrial	Naturalized alien	2.3	2	0	1	0	0
76	Gagea_elegans	Liliaceae	Monocot	Perennial	Herb	Teresstrial	Native	0	0	2	2	0	0
77	Gagea_gageoides	Liliaceae	Monocot	Perennial	Herb	Teresstrial	Native	0	0	0	0	3	0
78	Gagea_persica	Liliaceae	Monocot	Perennial	Herb	Teresstrial	Native	0	0	4	0	6.1	0
79	Gagea_stipilate	Liliaceae	Monocot	Perennial	Herb	Teresstrial	Native	0	0	1.8	0	0	0
80	Galinsoga_parviflora	Asteraceae	Dicot	Annual	Herb	Teresstrial	Invasive alien	3	0	4	0	0	0
81	Galium_aparine	Rubiaceae	Dicot	Annual	Herb	Teresstrial	Naturalized alien	7	0	0	0	0	0
82	Galium_palustre	Rubiaceae	Dicot	Perennial	Herb	Teresstrial	Naturalized alien	0	0	0	0	0	6.2
83	Galium_tricorne	Rubiaceae	Dicot	Annual	Herb	Teresstrial	Native	4.5	0	0	4.1	3.8	0
84	Gentiana_carinata	Gentianaceae	Dicot	Perennial	Herb	Teresstrial	Native	0	1	1	0	0	2
85	Geranium_nepalense	Geraniaceae	Dicot	Annual	Herb	Teresstrial	Native	3.5	0	0	0	0	1.9
86	Geranium_pusillum	Geraniaceae	Dicot	Annual	Herb	Teresstrial	Native	4	2.3	2.2	0	7	0
87	Geum_urbanum	Rosaceae	Dicot	Perennial	Herb	Teresstrial	Naturalized alien	1	0	0	0	0	0
88	Gnaphalium_luteoalbum	Asteraceae	Dicot	Perennial	Herb	Teresstrial	Native	0	2	3	0	0	4
89	Herniaria_hirsuta	Caryophyllaceae	Dicot	Annual	Herb	Teresstrial	Naturalized alien	0	3	4.1	6	0	0
90	Hieracium_umbellatum	Asteraceae	Dicot	Perennial	Herb	Teresstrial	Native	0	0	0	0	0	7.8
91	Holsteum_umbellatum	Caryophyllaceae	Dicot	Annual	Herb	Teresstrial	Naturalized alien	2	3.6	8.7	0	1.1	0
92	Hordeum_murinum	Poaceae	Monocot	Annual	Herb	Teresstrial	Naturalized alien	21.5	32	53.1	0	0	0
93	Hypericum_perforatum	Hypericaceae	Dicot	Perennial	Herb	Teresstrial	Naturalized alien	5	0	0	0	0	0
94	Impatiens_glandulifera	Balsaminaceae	Dicot	Annual	Herb	Teresstrial	Native	2	0	0	0	0	0
95	Imperata_cylindrica	Poaceae	Monocot	Perennial	Herb	Teresstrial	Naturalized alien	0	0	0	0	0	47
96	Juncus_articulatus	Juncaceae	Monocot	Perennial	Herb	Teresstrial	Invasive alien	0	0	0	0	0	3.1
97	Juncus_bufonius	Juncaceae	Monocot	Perennial	Herb	Teresstrial	Naturalized alien	0	5	4	0	0	0
98	Kickxia_subsessilis	Plantaginaceae	Dicot	Annual	Herb	Teresstrial	Native	0	0	0	2	2	0
99	Lapsana _communis	Asteraceae	Dicot	Annual	Herb	Teresstrial	Naturalized alien	3.3	0	0	0	0	0
100	Lathyrus_aphaca	Fabaceae	Dicot	Annual	Herb	Teresstrial	Naturalized alien	3	0	0	2.6	3.1	0
101	Lemna_minor	Lemnaceae	Monocot	Annual	Herb	Teresstrial	Invasive alien	0	0	0	0	0	29
102	Lespedeza_elegans	Fabaceae	Dicot	Perennial	Subshrub	Teresstrial	Native	0	0	2.2	0	2.9	0
103	Lithospermum_arvense	Boraginaceae	Dicot	Annual	Herb	Teresstrial	Invasive alien	1	0	0	0	0	0
104	Lolium_perenne	Poaceae	Monocot	Perennial	Herb	Teresstrial	Naturalized alien	16.3	0	0	41.7	28.6	25.1
105	Lotus_corniculatu	Fabaceae	Dicot	Perennial	Herb	Teresstrial	Naturalized alien	0	1.1	2	0	0	0
106	Lycopus_europaeus	Lamiaceae	Dicot	Perennial	Herb	Teresstrial	Naturalized alien	0	0	0	0	0	4
107	Lythrum_salicaria	Lythraceae	Dicot	Perennial	Herb	Teresstrial	Native	0	0	0	0	0	6.1
108	Malcolmia_africana	Brassicaceae	Dicot	Annual	Herb	Teresstrial	Naturalized alien	5	0	0	0	0	0
109	Malva_neglecta	Malvaceae	Dicot	Biennial	Herb	Teresstrial	Naturalized alien	2	0	0	0	0	0
110	Marsilea_quadifoliata	Marsiliaceae	Pteridophyte	Perennial	Herb	Teresstrial	Invasive alien	0	0	0	0	0	4.8
111	Marrubium_vulgare	Lamiaceae	Dicot	Perennial	Herb	Teresstrial	Invasive alien	8	0	0	0	0	0
112	Mazus_japonicus	Scrophulariaceae	Dicot	Annual	Herb	Teresstrial	Naturalized alien	0	5	6.1	0	0	4.9
113	Medicago_lupulina	Fabaceae	Dicot	Perennial	Herb	Teresstrial	Naturalized alien	35.2	32.5	21.1	11.8	52.1	0
114	Medicago_sativa	Fabaceae	Dicot	Biennial	Herb	Teresstrial	Naturalized alien	0	6.6	11.9	0	1	0
115	Melilotus_alba	Fabaceae	Dicot	Annual	Herb	Teresstrial	Naturalized alien	0	0	2	0	3	0
116	Melilotus_indicus	Fabaceae	Dicot	Annual	Herb	Teresstrial	Naturalized alien	0	0	5	0	4.1	0
117	Mentha_arvensis	Lamiaceae	Dicot	Perennial	Herb	Teresstrial	Naturalized alien	0	0	0	0	0	2.9
118	Mentha_longifolia	Lamiaceae	Dicot	Perennial	Herb	Teresstrial	Invasive alien	3	0	0	0	0	6.7
119	Mentha_spicata	Lamiaceae	Dicot	Perennial	Herb	Teresstrial	Casual alien	0	0	0	0	0	2.9
120	Monocharia_vaginalis	Pontederiaceae	Monocot	Perennial	Herb	Teresstrial	Native	0	0	0	0	0	7.1
121	Myosotis_refractus	Boraginaceae	Dicot	Perennial	Herb	Teresstrial	Native	0	2	2	0	0	0
122	Myosotis_sylvatica	Boraginaceae	Dicot	Perennial	Herb	Teresstrial	Native	1	1	1.8	0	0	0
123	Myriactis_nepalensis	Asteraceae	Dicot	Annual	Herb	Teresstrial	Native	2	0	0	0	0	0
124	Nepeta_laevigata	Lamiaceae	Dicot	Perennial	Herb	Teresstrial	Native	4	0	3	0	0	0
125	Neslia_paniculata	Brassicaceae	Dicot	Annual	Herb	Teresstrial	Native	4	0	0	0	0	0
126	Nymphoides_peltatum	Menyanthaceae	Dicot	Perennial	Herb	Aquatic	Invasive alien	0	0	0	0	0	4.1
127	Oenothera_glazioviana	Onagraceae	Dicot	Biennial	Herb	Teresstrial	Naturalized alien	1	0	0	0	0	0
128	Oenothera_rosea	Onagraceae	Dicot	Perennial	Herb	Teresstrial	Invasive alien	5.6	0	0	0	0	8
129	Onopordum_acanthium	Asteraceae	Dicot	Perennial	Herb	Teresstrial	Naturalized alien	1	0	3	0	1.1	0
130	Origanum_vulgare	Lamiaceae	Dicot	Perennial	Herb	Teresstrial	Naturalized alien	18	0	0	0	0	0
131	Oryzopis_munroi	Poaceae	Monocot	Perennial	Herb	Teresstrial	Native	24	0	0	0	0	13.9
132	Oxalis_corniculata	Oxalidaceae	Dicot	Perennial	Herb	Teresstrial	Naturalized alien	42.7	11.7	9.1	0	12	0
133	Papaver_macrostomum	Papaveraceae	Dicot	Annual	Herb	Teresstrial	Naturalized alien	1	1	2	0	0	0
134	Papaver_pamporicum	Papaveraceae	Dicot	Annual	Herb	Teresstrial	Native	2	0	0	0	0	0
135	Pennisetum_orientale	Poaceae	Monocot	Perennial	Herb	Teresstrial	Naturalized alien	0	0	0	0	0	4
136	Plantago_lanceolata	Plantaginaceae	Dicot	Perennial	Herb	Teresstrial	Invasive alien	3.6	4	0	5.1	6	3
137	Plantago_major	Plantaginaceae	Dicot	Perennial	Herb	Teresstrial	Invasive alien	2	2	0	17	12.5	2.1
138	Poa_annua	Poaceae	Monocot	Annual	Herb	Teresstrial	Invasive alien	27.3	19.2	17.5	0	44.1	33.6
139	Poa bulbosa	Poaceae	Monocot	Annual	Herb	Teresstrial	Native	13	31.2	15.7	0	0	0
140	Poa_pratensis	Poaceae	Monocot	Perennial	Herb	Teresstrial	Naturalized alien	10.5	0	0	0	0	0
141	Polygonum_aviculare	Polygonaceae	Dicot	Annual	Herb	Teresstrial	Invasive alien	4	0	0	0	0	0
142	Polygonum_hydropiper	Polygonaceae	Dicot	Annual	Herb	Teresstrial	Invasive alien	0	0	0	0	0	29.4
143	Polygonum_lapathifolium	Polygonaceae	Dicot	Annual	Herb	Teresstrial	Native	6.3	0	0	0	0	0
144	Polygonum_nepalense	Polygonaceae	Dicot	Perennial	Herb	Teresstrial	Native	10	0	0	0	0	8.7
145	Polygonum_rottbaellioides .	Polygonaceae	Dicot	Annual	Herb	Teresstrial	Casual alien	0	0	0	0	0	6.8
146	Polypogon_fugax	Poaceae	Monocot	Perennial	Herb	Teresstrial	Naturalized alien	16.3	11.9	7.1	0	0	27.2
147	Polypogon_monspeliensis	Poaceae	Monocot	Perennial	Herb	Teresstrial	Naturalized alien	2	0	0	0	0	0
148	Portulaca_oleracea	Portulacaceae	Dicot	Annual	Herb	Teresstrial	Naturalized alien	0	2	0	0	0	0
149	Potamogeton_nodosus	Potamogetonaceae	Monocot	Perennial	Herb	Aquatic	Naturalized alien	0	0	0	0	0	3.9
150	Potamogeton_pectinatus	Potamogetonaceae	Monocot	Perennial	Herb	Aquatic	Naturalized alien	0	0	0	0	0	2.8
151	Potentilla_reptans	Rosaceae	Dicot	Perennial	Herb	Teresstrial	Naturalized alien	1	7.3	0	0	6.8	6.1
152	Potentilla_supina	Rosaceae	Dicot	Perennial	Herb	Teresstrial	Naturalized alien	0	4	0	0	6.3	8.9
153	Prunella_vulgaris	Lamiaceae	Dicot	Annual	Herb	Teresstrial	Naturalized alien	0	0	0	0	0	7.1
154	Ranunculus_arvensis	Ranunculaceae	Dicot	Annual	Herb	Teresstrial	Invasive alien	1.8	2	3	0	1.1	0
155	Ranunculus_laetus	Ranunculaceae	Dicot	Perennial	Herb	Teresstrial	Invasive alien	3	0	0	0	0	5.6
156	Ranunculus_sceleratus	Ranunculaceae	Dicot	Annual	Herb	Teresstrial	Naturalized alien	0	0	0	0	0	3
157	Rochelia_bungei	Boraginaceae	Dicot	Annual	Herb	Teresstrial	Native	0	1	0	0	0	0
158	Rorippa_islandica	Brassicaceae	Dicot	Perennial	Herb	Teresstrial	Naturalized alien	0	4	0	0	0	2
159	Rorippa_sylvestris	Brassicaceae	Dicot	Perennial	Herb	Teresstrial	Native	0	5	6.2	0	0	2
160	Rubia_cordifolia	Rubiaceae	Dicot	Perennial	Herb	Teresstrial	Naturalized alien	1	0	0	0	0	0
161	Rumex_nepalensis	Polygonaceae	Dicot	Perennial	Herb	Teresstrial	Naturalized alien	3	0	0	0	0	0
162	Salvia_moocroftiana	Lamiaceae	Dicot	Perennial	Herb	Teresstrial	Native	1	0	0	0	2	0
163	Salvia_natans	Marsiliaceae	Pteridophyte	Annual	Herb	Aquatic	Invasive alien	0	0	0	0	0	4
164	Scandix_pecten-veneris	Apiaceae	Dicot	Annual	Herb	Teresstrial	Naturalized alien	2	0	0	0	0	0
165	Scutellaria_galericulata	Lamiaceae	Dicot	Perennial	Herb	Teresstrial	Native	0	0	0	0	0	2.1
166	Senecio_chrysenthemoides	Asteraceae	Dicot	Annual	Herb	Teresstrial	Native	1	0	0	0	0	0
167	Setaria_viridis	Poaceae	Monocot	Annual	Herb	Teresstrial	Invasive alien	0	0	91.3	0	61.2	0
168	Silene_conoidea	Caryophyllaceae	Dicot	Annual	Herb	Teresstrial	Naturalized alien	1	1	0	2	1	0
169	Sisymbrium_loeselii	Brassicaceae	Dicot	Annual	Herb	Teresstrial	Invasive alien	3	0	0	0	0	0
170	Sium_latijugum	Apiaceae	Dicot	Perennial	Herb	Teresstrial	Native	0	0	0	0	0	3.8
171	Sonchus_oleraceus	Asteraceae	Dicot	Annual	Herb	Teresstrial	Naturalized alien	3	0	0	0	0	0
172	Sorghum_halepense	Poaceae	Monocot	Perennial	Herb	Teresstrial	Invasive alien	0	0	33	0	46	26.3
173	Spergula_arvensis	Caryophyllaceae	Dicot	Annual	Herb	Teresstrial	Native	0	2	2	0	3	2
174	Stellaria_media	Caryophyllaceae	Dicot	Annual	Herb	Teresstrial	Invasive alien	0	2.1	3.9	0	4.2	0
175	Stipa_sibirica	Poaceae	Monocot	Perennial	Herb	Teresstrial	Native	25	0	0	0	0	0
176	Strobilanthus_attenuates	Acanthaceae	Dicot	Perennial	Shrub	Teresstrial	Native	0	0	0	0	0	1.9
177	Taraxacum_officinale	Asteraceae	Dicot	Perennial	Herb	Teresstrial	Invasive alien	1.7	1.3	2.2	0	0	0
178	Thlaspi_arvense	Brassicaceae	Dicot	Annual	Herb	Teresstrial	Native	1	0	0	0	0	0
179	Thymelea_passerina	Thymelaceae	Dicot	Annual	Herb	Teresstrial	Native	0	0	0	4	3	0
180	Thymus_linearis	Lamiaceae	Dicot	Perennial	Herb	Teresstrial	Native	12	0	0	0	0	0
181	Thymus_serpyllum	Lamiaceae	Dicot	Perennial	Herb	Teresstrial	Native	0	6.5	7.3	0	0	0
182	Trifolium_pratense	Fabaceae	Dicot	Perennial	Herb	Teresstrial	Invasive alien	31.8	0	22.1	0	39	0
183	Trifolium_repens	Fabaceae	Dicot	Perennial	Herb	Teresstrial	Invasive alien	37	56.8	24.6	0	0	0
184	Tribulus_terestris	Zygophyllaceae	Dicot	Annual	Herb	Teresstrial	Naturalized alien	0	0	0	5	0	0
185	Tulipa_stellata	Liliaceae	Monocot	Perennial	Herb	Teresstrial	Native	4	2	0	0	0	0
186	Turgenia_latifolia	Apiaceae	Dicot	Annual	Herb	Teresstrial	Native	2	0	0	0	0	0
187	Urtica_dioica	Urticaceae	Dicot	Perennial	Herb	Teresstrial	Invasive alien	1	0	0	0	0	0
188	Utricularia_minor	Lentibulariaceae	Dicot	Perennial	Herb	Aquatic	Naturalized alien	0	0	0	0	0	4.2
189	Vallerianella_dentata	Valerianaceae	Dicot	Annual	Herb	Teresstrial	Native	4	0	2	1	0	0
190	Verbascum_thapsus	Scrophulariaceae	Dicot	Biennial	Herb	Teresstrial	Native	0	0	0	0	0	2
191	Verbena_officinalis	Verbenaceae	Dicot	Perennial	Herb	Teresstrial	Native	3	0	0	0	0	1.1
192	Veronica_agrestis	Scrophulariaceae	Dicot	Annual	Herb	Teresstrial	Native	4.7	0	0	0	0	0
193	Veronica_anagallis- aquatica	Scrophulariaceae	Dicot	Annual	Herb	Teresstrial	Naturalized alien	0	0	0	0	0	5.1
194	Veronica_cana	Scrophulariaceae	Dicot	Perennial	Herb	Teresstrial	Native	5.5	0	0	0	0	0
195	Veronica_laxa	Scrophulariaceae	Dicot	Perennial	Herb	Teresstrial	Native	4	0	0	0	0	0
196	Veronica_persica	Scrophulariaceae	Dicot	Annual	Herb	Teresstrial	Invasive alien	11.6	11	16.4	0	0	0
197	Vicia_sativa	Fabaceae	Dicot	Annual	Herb	Teresstrial	Casual alien	1.2	0	0	1.2	1.1	0
198	Vulpia_myuros	Poaceae	Monocot	Annual	Herb	Teresstrial	Invasive alien	92.6	0	12.7	0	39.8	17.9
